# Supplementary material
Source: HighWire-hosted journal article supplement (https://jcp.bmj.com/content/70/8/715)
Supplement: inline-supplementary-material-1 [file inline-supplementary-material-1.pdf]

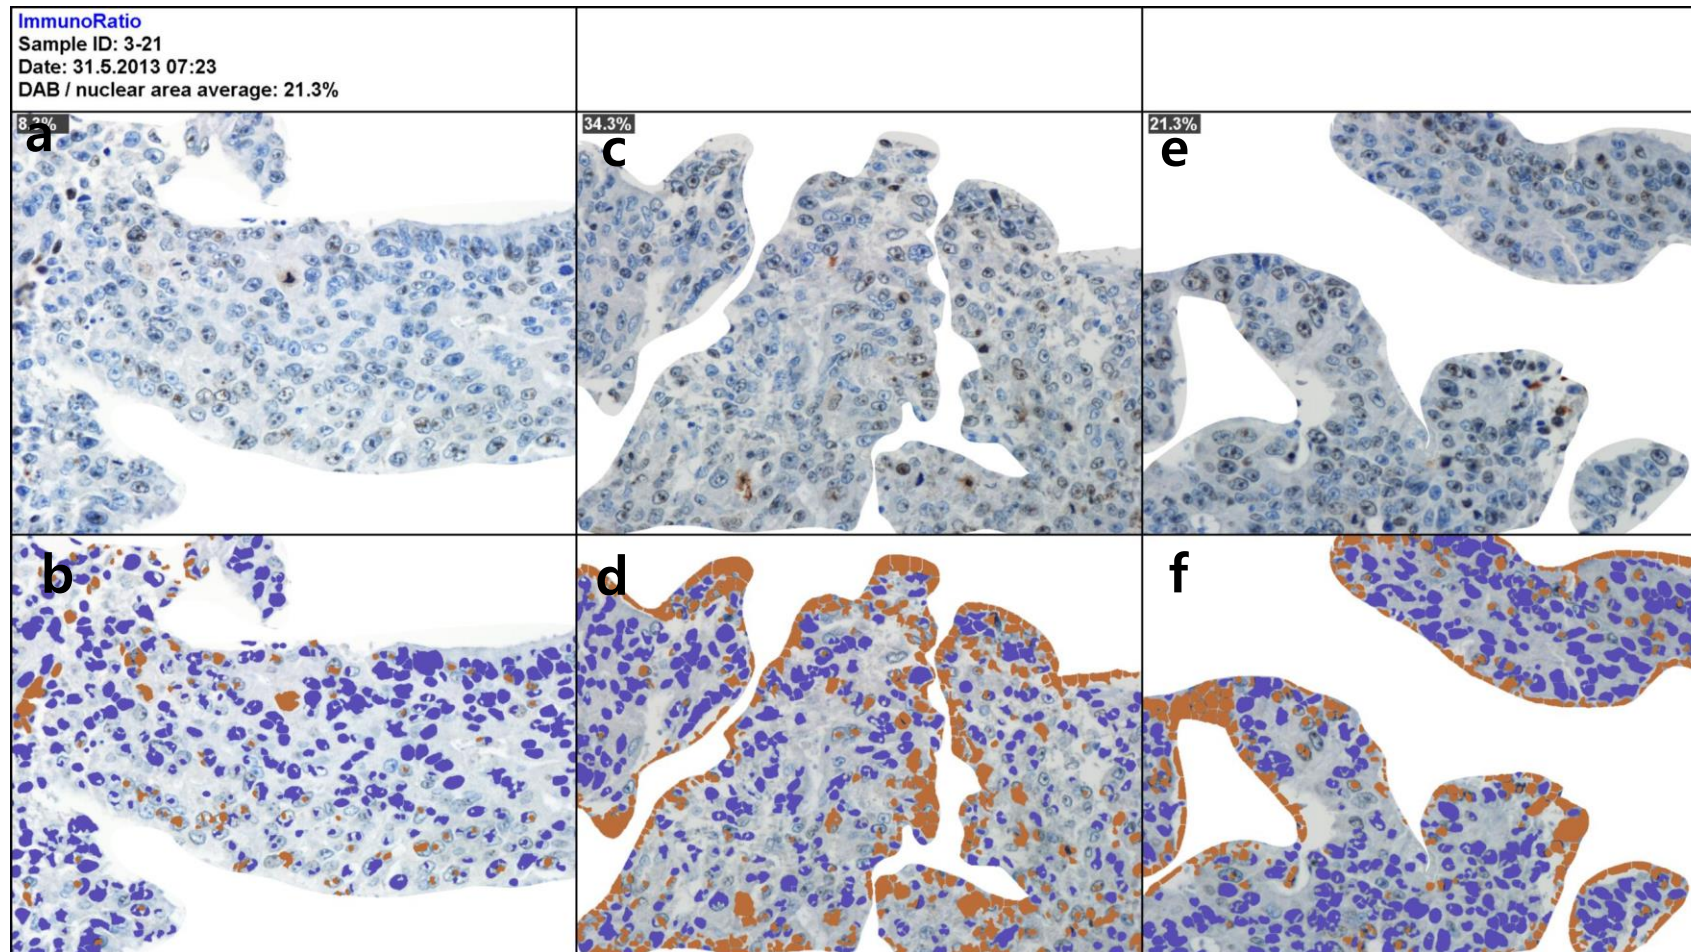

Supplmentary figure 1. The uninterpretable images using ImmunoRatio. Uploaded Ki67 images failed to convolute compatible ImmunoRatio pseudo (montage) images (a -> b, c -> d, and e -> f).
